# Supplementary material for: Network-Driven Proteogenomics Unveils an Aging-Related Imbalance in the Olfactory IκBα-NFκB p65 Complex Functionality in Tg2576 Alzheimer’s Disease Mouse Model
Source: MDPI journal article supplement (doi:10.3390/ijms18112260), 2017-10-27
Supplement: s1 [file s1]

***Network-driven proteogenomics unveils an aging-related imbalance in the olfactory I $\kappa$ B alpha-NF $\kappa$ B p65 complex functionality in Tg2576 Alzheimer's disease mouse model***

*Maialen Palomino, Mercedes Lachen-Montes, Andrea González-Morales, Karina Ausín, Alberto Pérez-Mediavilla, Joaquín Fernández-Irigoyen, Enrique Santamaría*

**- Table S5 -**

**EQUAL LOADING CONTROL & QUANTITATION  
(Figures 2, 4, 6, and 7)**

**Figure 2a**

Intensity values corresponding to **APP**. Western Blot

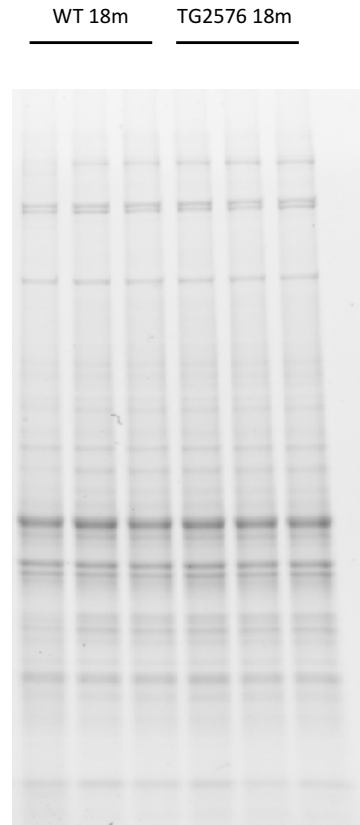

Gel stain free adquisition, 2.5min

|                  |         | Volume (Intensity) |        |                |             |                 |
|------------------|---------|--------------------|--------|----------------|-------------|-----------------|
|                  | Samples | STAIN FREE         | APP    | APP/STAIN FREE |             | Fold of Control |
| WT 18 months     | 8673    | 20139803           | 19338  | 0.00096019     | 0.001139948 | 0.84230878      |
|                  | 8675    | 24335529           | 19316  | 0.00079374     |             | 0.69629199      |
|                  | 8681    | 21763363           | 36256  | 0.00166592     |             | 1.46139923      |
| TG2576 18 months | 8674    | 23776718           | 236082 | 0.00992912     |             | 8.71015654      |
|                  | 8676    | 20728806           | 176220 | 0.00850121     |             | 7.45754533      |
|                  | 8677    | 21905110           | 155232 | 0.00708657     |             | 6.21656969      |

|                  |         | APP        |
|------------------|---------|------------|
| WT 18 months     | Mean    | 1          |
|                  | SD      | 0.40619843 |
|                  | n       | 3          |
|                  | SEM     | 0.23451877 |
| TG2576 18 months | Mean    | 7.46142385 |
|                  | SD      | 1.24679795 |
|                  | n       | 3          |
|                  | SEM     | 0.71983913 |
|                  | p value | 0.00365567 |

**Figure 4**

# Intensity values corresponding to pFAK, FAK, pERK and ERK. Western Blot

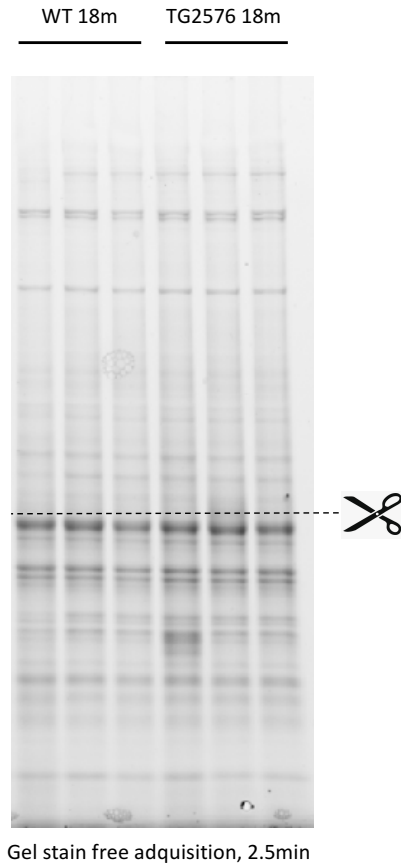

|                  |         | Volume (Intensity) |        |         | pFAK/STAIN FREE |            | Fold of Control | FAK/STAIN FREE |            | Fold of Control |
|------------------|---------|--------------------|--------|---------|-----------------|------------|-----------------|----------------|------------|-----------------|
|                  | Samples | STAIN FREE         | pFAK   | FAK     |                 |            |                 |                |            |                 |
| WT 18 months     | 8673    | 26500464           | 106146 | 1333496 | 0.00400544      | 0.00366997 | 1.09140998      | 0.05031972     | 0.05741074 | 0.87648627      |
|                  | 8675    | 29346876           | 137826 | 2059600 | 0.00469645      |            | 1.27969668      | 0.07018123     |            | 1.22244093      |
|                  | 8681    | 24558732           | 56682  | 1270454 | 0.00230802      |            | 0.62889334      | 0.05173125     |            | 0.9010728       |
| TG2576 18 months | 8674    | 37941696           | 107496 | 2751466 | 0.00283319      |            | 0.77199295      | 0.07251827     |            | 1.26314814      |
|                  | 8676    | 32297508           | 113148 | 1985918 | 0.0035033       |            | 0.95458726      | 0.06148827     |            | 1.07102393      |
|                  | 8677    | 29815812           | 123516 | 2020555 | 0.00414263      |            | 1.1287931       | 0.0677679      |            | 1.18040465      |

|                  |         | pFAK       | FAK        |
|------------------|---------|------------|------------|
| WT 18 months     | Mean    | 1          | 1          |
|                  | SD      | 0.33489265 | 0.19303134 |
|                  | n       | 3          | 3          |
|                  | SEM     | 0.19335036 | 0.1114467  |
| TG2576 18 months | Mean    | 0.9517911  | 1.17152557 |
|                  | SD      | 0.17841651 | 0.09636938 |
|                  | n       | 3          | 3          |
|                  | SEM     | 0.10300882 | 0.05563889 |
|                  | p value | 0.41986742 | 0.13201595 |

|                  |         | Volume (Intensity) |         |         | pERK/STAIN FREE |           | Fold of Control | ERK/STAIN FREE |            | Fold of Control |
|------------------|---------|--------------------|---------|---------|-----------------|-----------|-----------------|----------------|------------|-----------------|
|                  | Samples | STAIN FREE         | pERK    | ERK     |                 |           |                 |                |            |                 |
| WT 18 months     | 8673    | 26500464           | 1697472 | 2752902 | 0.06405443      | 0.0735962 | 0.87034967      | 0.10388128     | 0.10214968 | 1.01695153      |
|                  | 8675    | 29346876           | 3424212 | 3125020 | 0.11668063      |           | 1.58541658      | 0.10648561     |            | 1.04244681      |
|                  | 8681    | 24558732           | 983664  | 2359656 | 0.04005353      |           | 0.54423374      | 0.09608216     |            | 0.94060165      |
| TG2576 18 months | 8674    | 37941696           | 1461474 | 3564108 | 0.03851894      |           | 0.52338224      | 0.09393644     |            | 0.91959605      |
|                  | 8676    | 32297508           | 3068406 | 3856176 | 0.09500442      |           | 1.29088763      | 0.11939547     |            | 1.16882856      |
|                  | 8677    | 29815812           | 3571164 | 3594798 | 0.11977417      |           | 1.62745048      | 0.12056683     |            | 1.18029572      |

|                  |         | pERK       | ERK        |
|------------------|---------|------------|------------|
| WT 18 months     | Mean    | 1          | 1          |
|                  | SD      | 0.53256204 | 0.05299646 |
|                  | n       | 3          | 3          |
|                  | SEM     | 0.30747484 | 0.03059752 |
| TG2576 18 months | Mean    | 1.14724011 | 1.08957344 |
|                  | SD      | 0.56587775 | 0.14731636 |
|                  | n       | 3          | 3          |
|                  | SEM     | 0.32670967 | 0.08505314 |
|                  | p value | 0.37964307 | 0.20371266 |

**Figure 4**

# Intensity values corresponding to pAKT, AKT, pP38 and P38. Western Blot

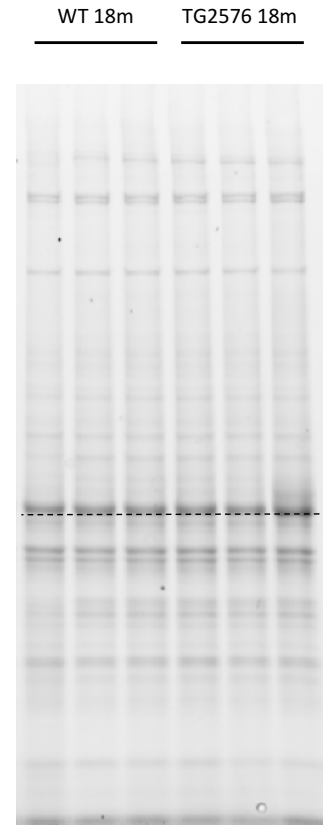

|                  |         | Volume (Intensity) |         |         | pAKT/STAIN FREE |            | Fold of Control | AKT/STAIN FREE |            | Fold of Control |
|------------------|---------|--------------------|---------|---------|-----------------|------------|-----------------|----------------|------------|-----------------|
|                  | Samples | STAIN FREE         | pAKT    | AKT     |                 |            |                 |                |            |                 |
| WT 18 months     | 8673    | 23178317           | 1378507 | 3248905 | 0.05947399      | 0.08546237 | 0.69590849      | 0.14017001     | 0.17967727 | 0.78012101      |
|                  | 8675    | 22574958           | 1824551 | 3769220 | 0.0808219       |            | 0.94570158      | 0.16696465     |            | 0.92924748      |
|                  | 8681    | 19172586           | 2225769 | 4446068 | 0.11609123      |            | 1.35838993      | 0.23189715     |            | 1.29063151      |
| TG2576 18 months | 8674    | 23416079           | 2043659 | 4333340 | 0.08727588      |            | 1.02122001      | 0.18505831     |            | 1.02994836      |
|                  | 8676    | 20415527           | 2173942 | 4236411 | 0.10648474      |            | 1.24598386      | 0.20750926     |            | 1.15489992      |
|                  | 8677    | 25993166           | 2719679 | 4152925 | 0.10463054      |            | 1.22428781      | 0.15976988     |            | 0.88920473      |

|                  |      | pAKT       | AKT        |
|------------------|------|------------|------------|
| WT 18 months     | Mean | 1          | 1          |
|                  | SD   | 0.33456188 | 0.26250654 |
|                  | n    | 3          | 3          |
|                  | SEM  | 0.19315939 | 0.15155822 |
| TG2576 18 months | Mean | 1.16383056 | 1.02468434 |
|                  | SD   | 0.12397986 | 0.13292579 |
|                  | n    | 3          | 3          |
|                  | SEM  | 0.07157981 | 0.07674474 |
| p value          |      | 0.24700508 | 0.4468967  |

|                  |         | Volume (Intensity) |         |         | pP38/STAIN FREE |            | Fold of Control | P38/STAIN FREE |            | Fold of Control |
|------------------|---------|--------------------|---------|---------|-----------------|------------|-----------------|----------------|------------|-----------------|
|                  | Samples | STAIN FREE         | pP38    | P38     |                 |            |                 |                |            |                 |
| WT 18 months     | 8673    | 23178317           | 772711  | 527098  | 0.03333767      | 0.04580647 | 0.7277939       | 0.022741       | 0.04258387 | 0.53402844      |
|                  | 8675    | 22574958           | 861517  | 1064100 | 0.03816251      |            | 0.8331249       | 0.0471363      |            | 1.10690516      |
|                  | 8681    | 19172586           | 1263842 | 1109600 | 0.06591922      |            | 1.43908121      | 0.0578743      |            | 1.35906639      |
| TG2576 18 months | 8674    | 23416079           | 1017184 | 1218223 | 0.04343955      |            | 0.94832797      | 0.05202506     |            | 1.22170834      |
|                  | 8676    | 20415527           | 1005556 | 1172452 | 0.04925447      |            | 1.07527334      | 0.05742943     |            | 1.34861938      |
|                  | 8677    | 25993166           | 976106  | 1362775 | 0.03755241      |            | 0.81980585      | 0.0524282      |            | 1.23117531      |

|                  |      | pP38       | P38        |
|------------------|------|------------|------------|
| WT 18 months     | Mean | 1          | 1          |
|                  | SD   | 0.38388525 | 0.4227806  |
|                  | n    | 3          | 3          |
|                  | SEM  | 0.22163625 | 0.2440925  |
| TG2576 18 months | Mean | 0.94780239 | 1.26716768 |
|                  | SD   | 0.12773456 | 0.07069788 |
|                  | n    | 3          | 3          |
|                  | SEM  | 0.07374758 | 0.04081744 |
| p value          |      | 0.42027346 | 0.1940481  |

**Figure 4**

# Intensity values corresponding to pPKC, PKC, pPDK1 and PDK1. Western Blot

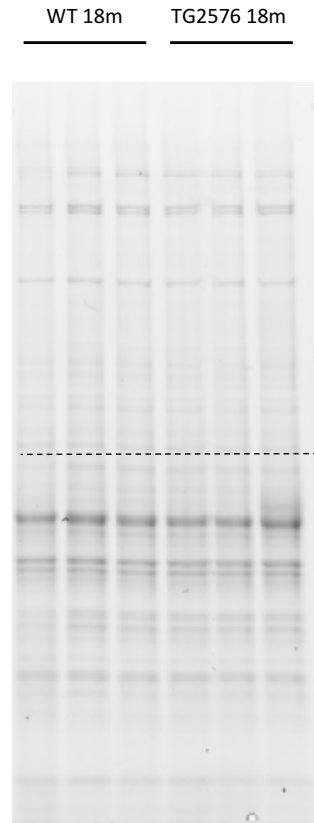

|                  | Samples | Volume (Intensity) |          |         | pPKC/STAIN FREE |            | Fold of Control | PKC/STAIN FREE |            | Fold of Control |
|------------------|---------|--------------------|----------|---------|-----------------|------------|-----------------|----------------|------------|-----------------|
|                  |         | STAIN FREE         | pPKC pan | PKC pan |                 |            |                 |                |            |                 |
| WT 18 months     | 8673    | 27021528           | 1911474  | 535644  | 0.070738931     | 0.09372204 | 0.75477367      | 0.01982286     | 0.02924261 | 0.67787587      |
|                  | 8675    | 29219508           | 3888630  | 1285200 | 0.13308335      |            | 1.41997917      | 0.04398431     |            | 1.50411711      |
|                  | 8681    | 30425328           | 2353212  | 727794  | 0.07734385      |            | 0.82524716      | 0.02392066     |            | 0.81800703      |
| TG2576 18 months | 8674    | 31374720           | 2650914  | 839466  | 0.084492037     |            | 0.90151723      | 0.02675613     |            | 0.91497048      |
|                  | 8676    | 26838468           | 5088312  | 1215126 | 0.189590255     |            | 2.02289929      | 0.04527554     |            | 1.54827259      |
|                  | 8677    | 35575308           | 4037850  | 931518  | 0.113501477     |            | 1.21104356      | 0.0261844      |            | 0.89541923      |

|                  |         | pPKC pan   | PKC pan    |
|------------------|---------|------------|------------|
|                  |         |            |            |
| WT 18 months     | Mean    | 1          | 1          |
|                  | SD      | 0.36541553 | 0.44216482 |
|                  | n       | 3          | 3          |
|                  | SEM     | 0.21097275 | 0.25528398 |
| TG2576 18 months | Mean    | 1.37848669 | 1.1195541  |
|                  | SD      | 0.57913931 | 0.37140977 |
|                  | n       | 3          | 3          |
|                  | SEM     | 0.33436623 | 0.21443353 |
|                  | p value | 0.20092239 | 0.36926717 |

|                  | Samples | Volume (Intensity) |         |        | pPDK1/STAIN FREE |            | Fold of Control | PDK1/STAIN FREE |            | Fold of Control |
|------------------|---------|--------------------|---------|--------|------------------|------------|-----------------|-----------------|------------|-----------------|
|                  |         | STAIN FREE         | pPDK1   | PDK1   |                  |            |                 |                 |            |                 |
| WT 18 months     | 8673    | 27021528           | 2679534 | 462672 | 0.099162934      | 0.14164278 | 0.70009167      | 0.01712235      | 0.02620342 | 0.65343935      |
|                  | 8675    | 29219508           | 5007744 | 945540 | 0.171383584      |            | 1.20997045      | 0.03235989      |            | 1.23494886      |
|                  | 8681    | 30425328           | 4697118 | 886230 | 0.154381836      |            | 1.08993788      | 0.02912803      |            | 1.11161179      |
| TG2576 18 months | 8674    | 31374720           | 3793500 | 741366 | 0.120909446      |            | 0.85362234      | 0.02362941      |            | 0.9017679       |
|                  | 8676    | 26838468           | 3610962 | 690822 | 0.134544267      |            | 0.94988437      | 0.02573999      |            | 0.98231416      |
|                  | 8677    | 35575308           | 3336282 | 520956 | 0.093780832      |            | 0.66209396      | 0.01464375      |            | 0.55884883      |

|                  |         | pPDK1      | PDK1       |
|------------------|---------|------------|------------|
|                  |         |            |            |
| WT 18 months     | Mean    | 1          | 1          |
|                  | SD      | 0.26657214 | 0.30640043 |
|                  | n       | 3          | 3          |
|                  | SEM     | 0.1539055  | 0.17690037 |
| TG2576 18 months | Mean    | 0.82186689 | 0.8143103  |
|                  | SD      | 0.14649961 | 0.22487185 |
|                  | n       | 3          | 3          |
|                  | SEM     | 0.08458159 | 0.12982982 |
|                  | p value | 0.19139064 | 0.22452876 |

**Figure 4**

## Intensity values corresponding to pMEK and MEK.

### Western Blot

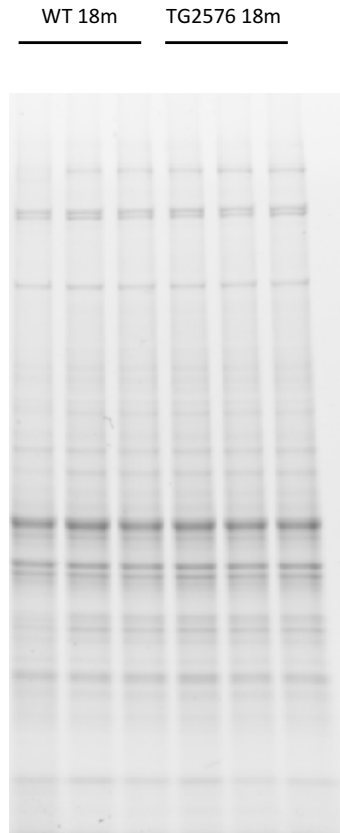

Gel stain free adquisition, 2.5min

|                  | Samples | Volume (Intensity) |        |         | pMEK/STAIN FREE |            | Fold of Control | MEK/STAIN FREE |            | Fold of Control |
|------------------|---------|--------------------|--------|---------|-----------------|------------|-----------------|----------------|------------|-----------------|
|                  |         | STAIN FREE         | pMEK   | MEK     |                 |            |                 |                |            |                 |
| WT 18 months     | 8673    | 20139803           | 124146 | 2344410 | 0.006164211     | 0.00864722 | 0.71285479      | 0.1164068      | 0.13934368 | 0.83539347      |
|                  | 8675    | 24335529           | 217892 | 3457430 | 0.008953658     |            | 1.0354379       | 0.14207334     |            | 1.01958945      |
|                  | 8681    | 21763363           | 235562 | 3472364 | 0.010823787     |            | 1.25170731      | 0.15955089     |            | 1.14501708      |
| TG2576 18 months | 8674    | 23776718           | 165756 | 3835644 | 0.006971357     |            | 0.80619651      | 0.16131932     |            | 1.15770821      |
|                  | 8676    | 20728806           | 328187 | 3930967 | 0.015832412     |            | 1.8309254       | 0.18963789     |            | 1.36093643      |
|                  | 8677    | 21905110           | 310935 | 3412077 | 0.014194633     |            | 1.64152588      | 0.15576626     |            | 1.11785664      |

|                  |         | pMEK       | MEK        |
|------------------|---------|------------|------------|
|                  |         |            |            |
| WT 18 months     | Mean    | 1          | 1          |
|                  | SD      | 0.27116857 | 0.15573858 |
|                  | n       | 3          | 3          |
|                  | SEM     | 0.15655925 | 0.08991571 |
| TG2576 18 months | Mean    | 1.42621593 | 1.21216709 |
|                  | SD      | 0.54523949 | 0.13036975 |
|                  | n       | 3          | 3          |
|                  | SEM     | 0.31479417 | 0.07526901 |
|                  | p value | 0.15697984 | 0.07343564 |

**Figure 4**

# Intensity values corresponding to pSEK and SEK.

## Western Blot

WT 18m      TG2576 18m

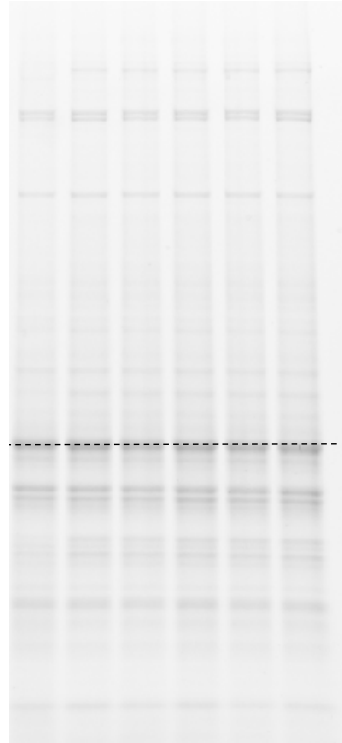

Gel stain free adquisition, 2.5min

|                  | Samples | Volume (Intensity) |        |         | pSEK/STAIN FREE |            | Fold of Control | SEK/STAIN FREE |            | Fold of Control |
|------------------|---------|--------------------|--------|---------|-----------------|------------|-----------------|----------------|------------|-----------------|
|                  |         | STAIN FREE         | pSEK   | SEK     |                 |            |                 |                |            |                 |
| WT 18 months     | 8673    | 15393060           | 411825 | 1565118 | 0.02675394      | 0.03171491 | 0.84357621      | 0.10167686     | 0.12173493 | 0.83523163      |
|                  | 8675    | 18148428           | 706914 | 2354004 | 0.038951803     |            | 1.22818602      | 0.129708424    |            | 1.06549886      |
|                  | 8681    | 16967304           | 499500 | 2270556 | 0.029438973     |            | 0.92823776      | 0.133819492    |            | 1.09926951      |
| TG2576 18 months | 8674    | 18114156           | 661820 | 2843802 | 0.036536066     |            | 1.15201561      | 0.156993348    |            | 1.28963276      |
|                  | 8676    | 18674388           | 760986 | 2439090 | 0.040750251     |            | 1.28489272      | 0.130611509    |            | 1.07291732      |
|                  | 8677    | 19698408           | 995346 | 2917480 | 0.050529261     |            | 1.59323386      | 0.1481074      |            | 1.21663853      |

|                  |         | pSEK       | SEK        |
|------------------|---------|------------|------------|
| WT 18 months     | Mean    | 1          | 1          |
|                  | SD      | 0.20209785 | 0.14368917 |
|                  | n       | 3          | 3          |
|                  | SEM     | 0.11668125 | 0.08295898 |
| TG2576 18 months | Mean    | 1.34338073 | 1.19306287 |
|                  | SD      | 0.22634933 | 0.11026448 |
|                  | n       | 3          | 3          |
|                  | SEM     | 0.13068285 | 0.06366123 |
|                  | p value | 0.0612272  | 0.07168272 |

**Figure 6b**

Intensity values corresponding to **CREB1**. Western Blot

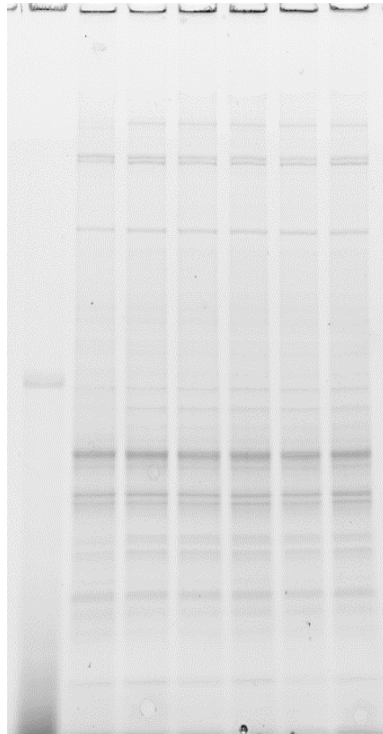

Gel stain free adquisition, 2.5min

|                 | Nombre Muestras | Volume (Intensity) |         | CREB1/STAIN FREE |            | Fold of Control |
|-----------------|-----------------|--------------------|---------|------------------|------------|-----------------|
|                 |                 | STAIN FREE         | CREB1   |                  |            |                 |
| WT 18months     | 8524            | 21550860           | 3301041 | 0.153174444      | 0.17193765 | 0.89087202      |
|                 | 8527            | 24729328           | 4096548 | 0.165655452      |            | 0.96346233      |
|                 | 8528            | 22717491           | 4474961 | 0.196983065      |            | 1.14566566      |
| TG2576 18months | 8522            | 29187591           | 3464076 | 0.118683176      |            | 0.69026867      |
|                 | 8526            | 24587151           | 3475925 | 0.141371605      |            | 0.82222598      |
|                 | 8529            | 26360776           | 2638950 | 0.100108965      |            | 0.58223992      |

|                 |                 | CREB1      |
|-----------------|-----------------|------------|
| WT 18months     | Fold of control | 1          |
|                 | SD              | 0.13126767 |
|                 | n               | 3          |
|                 | SEM             | 0.07578742 |
| TG2576 18months | Mean            | 0.69824486 |
|                 | SD              | 0.12019169 |
|                 | n               | 3          |
|                 | SEM             | 0.0693927  |
|                 | p value         | 0.02146972 |



**Figure 7a**

# Intensity values corresponding to pIKBA and IKBA

## Western Blot

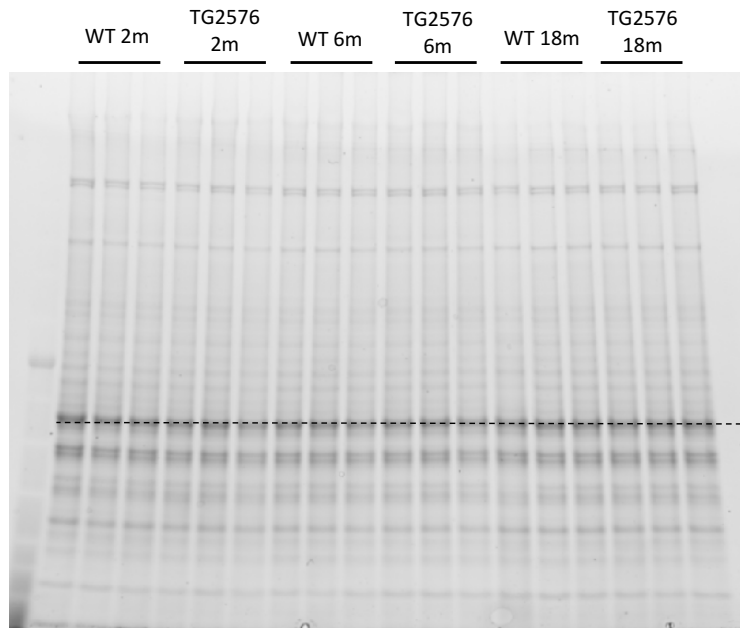

Gel stain free adquisition, 2.5min

|                  |         | p-IkBA     | IkBA       |
|------------------|---------|------------|------------|
| WT 2 months      | Mean    | 1          | 1          |
|                  | SD      | 0.65262192 | 0.08335147 |
|                  | n       | 3          | 3          |
|                  | SEM     | 0.37679144 | 0.048123   |
| TG2576 2 months  | Mean    | 2.19249666 | 0.9980587  |
|                  | SD      | 0.64472337 | 0.2570598  |
|                  | n       | 3          | 3          |
|                  | SEM     | 0.37223121 | 0.14841355 |
|                  | p value | 0.04375552 | 0.49551295 |
| WT 6 months      | Mean    | 1          | 1          |
|                  | SD      | 0.45111096 | 0.10778573 |
|                  | n       | 3          | 3          |
|                  | SEM     | 0.26044903 | 0.06223012 |
| TG2576 6 months  | Mean    | 1.59864948 | 1.23524982 |
|                  | SD      | 0.30575573 | 0.04381985 |
|                  | n       | 3          | 3          |
|                  | SEM     | 0.17652815 | 0.0252994  |
|                  | p value | 0.06977989 | 0.02400159 |
| WT 18 months     | Mean    | 1          | 1          |
|                  | SD      | 0.10874566 | 0.07022497 |
|                  | n       | 3          | 3          |
|                  | SEM     | 0.06278434 | 0.04054441 |
| TG2576 18 months | Mean    | 0.40020269 | 0.70310606 |
|                  | SD      | 0.27621712 | 0.14440944 |
|                  | n       | 3          | 3          |
|                  | SEM     | 0.15947403 | 0.08337483 |
|                  | p value | 0.0245794  | 0.02586233 |

|                  |         | Volume (Intensity) |         |        |                   |            |                 |                 |            |                 |
|------------------|---------|--------------------|---------|--------|-------------------|------------|-----------------|-----------------|------------|-----------------|
|                  | Samples | STAIN FREE         | p-IkBA  | IkBA   | p-IkBA/STAIN FREE |            | Fold of Control | IkBA/STAIN FREE |            | Fold of Control |
| WT 2 months      | 8673    | 43893078           | 1119316 | 193724 | 0.025500969       | 0.01695647 | 1.50390756      | 0.004413543     | 0.00409938 | 1.07663571      |
|                  | 8675    | 40825338           | 853758  | 169385 | 0.020912454       |            | 1.23330208      | 0.004149016     |            | 1.01210728      |
|                  | 8681    | 34103024           | 151963  | 127395 | 0.004455998       |            | 0.26279036      | 0.003735592     |            | 0.91125701      |
| TG2576 2 months  | 8674    | 28208654           | 1361938 | 144514 | 0.048280857       |            | 2.84734073      | 0.005123038     |            | 1.24970914      |
|                  | 8676    | 37311060           | 1373991 | 154261 | 0.036825301       |            | 2.17175469      | 0.004134458     |            | 1.00855583      |
|                  | 8677    | 34935566           | 923168  | 105393 | 0.026424876       |            | 1.55839457      | 0.003016782     |            | 0.73591113      |
| WT 6 months      | 8621    | 30123398           | 563057  | 107787 | 0.018691683       | 0.03336435 | 0.56022922      | 0.003578182     | 0.00406011 | 0.8813007       |
|                  | 8623    | 29834180           | 1454928 | 124393 | 0.048767152       |            | 1.46165459      | 0.004169479     |            | 1.02693636      |
|                  | 8625    | 28122698           | 917762  | 124659 | 0.032634209       |            | 0.97811619      | 0.004432683     |            | 1.09176294      |
| TG2576 6 months  | 8622    | 36212252           | 1596120 | 174211 | 0.044076795       |            | 1.32107466      | 0.00481083      |            | 1.18490009      |
|                  | 8624    | 41292282           | 2133340 | 212040 | 0.051664376       |            | 1.54849052      | 0.0051351       |            | 1.26476723      |
|                  | 8626    | 29655846           | 1906056 | 151240 | 0.064272522       |            | 1.92638326      | 0.005099838     |            | 1.25608215      |
| WT 18 months     | 8673    | 34257152           | 2127447 | 188157 | 0.062102273       | 0.05519952 | 1.12505086      | 0.005492488     | 0.00538094 | 1.02073063      |
|                  | 8675    | 36137012           | 1889703 | 205637 | 0.05229273        |            | 0.94734021      | 0.005690482     |            | 1.05752597      |
|                  | 8681    | 36380782           | 1862826 | 180443 | 0.051203572       |            | 0.92760893      | 0.004959844     |            | 0.92174339      |
| TG2576 18 months | 8674    | 35859498           | 1152216 | 167371 | 0.032131404       |            | 0.58209565      | 0.004667411     |            | 0.86739723      |
|                  | 8676    | 47914428           | 1418046 | 153729 | 0.029595386       |            | 0.53615291      | 0.003208407     |            | 0.59625429      |
|                  | 8677    | 43279606           | 196758  | 150366 | 0.004546206       |            | 0.08235951      | 0.003474292     |            | 0.64566668      |

Figure 7b

## Intensity values corresponding to pNFKB and NFKB

## Western Blot

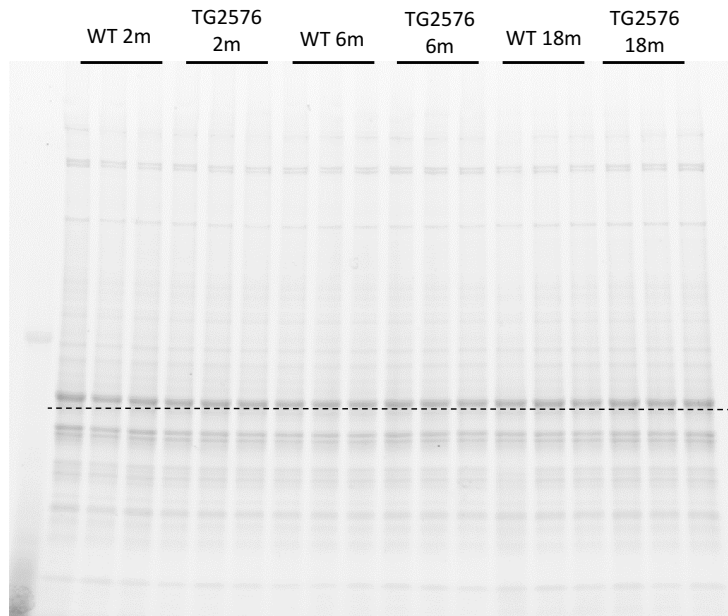

Gel stain free adquisition, 2.5min

|                  |         | pNFKB      | NFKB       |
|------------------|---------|------------|------------|
| WT 2 months      | Mean    | 1          | 1          |
|                  | SD      | 0.16840106 | 0.09301045 |
|                  | n       | 3          | 3          |
|                  | SEM     | 0.0972264  | 0.05369961 |
| TG2576 2 months  | Mean    | 0.66944854 | 1.02410997 |
|                  | SD      | 0.20325678 | 0.0841363  |
|                  | n       | 3          | 3          |
|                  | SEM     | 0.11735036 | 0.04857611 |
|                  | p value | 0.04913662 | 0.37802083 |
| WT 6 months      | Mean    | 1          | 1          |
|                  | SD      | 0.09619447 | 0.13055263 |
|                  | n       | 3          | 3          |
|                  | SEM     | 0.05553791 | 0.0753746  |
| TG2576 6 months  | Mean    | 1.8324013  | 1.56030388 |
|                  | SD      | 0.13389499 | 0.07425869 |
|                  | n       | 3          | 3          |
|                  | SEM     | 0.07730431 | 0.04287328 |
|                  | p value | 0.00072246 | 0.00316748 |
| WT 18 months     | Mean    | 1          | 1          |
|                  | SD      | 0.13239365 | 0.14367937 |
|                  | n       | 3          | 3          |
|                  | SEM     | 0.07643751 | 0.08295332 |
| TG2576 18 months | Mean    | 0.98579401 | 1.20493956 |
|                  | SD      | 0.2092376  | 0.22721086 |
|                  | n       | 3          | 3          |
|                  | SEM     | 0.12080339 | 0.13118025 |
|                  | p value | 0.46322391 | 0.1345078  |

|                  |         | Volume (Intensity) |        |         |                  |            |                 |                 |            |                 |
|------------------|---------|--------------------|--------|---------|------------------|------------|-----------------|-----------------|------------|-----------------|
|                  | Samples | STAIN FREE         | pNFKB  | NFKB    | pNFKB/STAIN FREE |            | Fold of Control | NFKB/STAIN FREE |            | Fold of Control |
| WT 2 months      | 8673    | 20578656           | 186912 | 2847240 | 0.009082809      | 0.01126938 | 0.80597259      | 0.13835889      | 0.13102285 | 1.05599052      |
|                  | 8675    | 13561848           | 169362 | 1868202 | 0.012488121      |            | 1.10814655      | 0.137754235     |            | 1.05137564      |
|                  | 8681    | 16140456           | 197514 | 1887714 | 0.012237201      |            | 1.08588086      | 0.116955432     |            | 0.89263384      |
| TG2576 2 months  | 8674    | 14027616           | 142848 | 1744488 | 0.010183341      |            | 0.90362948      | 0.124360975     |            | 0.94915484      |
|                  | 8676    | 13768920           | 83610  | 2011716 | 0.006072372      |            | 0.53883828      | 0.146105577     |            | 1.11511522      |
|                  | 8677    | 13568256           | 86526  | 1792080 | 0.006377091      |            | 0.56587785      | 0.132078876     |            | 1.00805984      |
| WT 6 months      | 8621    | 13444704           | 67536  | 1425906 | 0.005023242      | 0.00546664 | 0.91889021      | 0.106057076     | 0.10413088 | 1.01849787      |
|                  | 8623    | 14213376           | 75744  | 1274598 | 0.005329065      |            | 0.97483368      | 0.08967595      |            | 0.86118501      |
|                  | 8625    | 14441400           | 87336  | 1684728 | 0.006047613      |            | 1.10627611      | 0.116659604     |            | 1.12031712      |
| TG2576 6 months  | 8622    | 14870736           | 158868 | 2435382 | 0.010683264      |            | 1.9542652       | 0.163770105     |            | 1.57273337      |
|                  | 8624    | 14267592           | 144594 | 2418066 | 0.010134436      |            | 1.85386935      | 0.169479615     |            | 1.62756351      |
|                  | 8626    | 14123520           | 130410 | 2177532 | 0.009233534      |            | 1.68906934      | 0.154177712     |            | 1.48061475      |
| WT 18 months     | 8673    | 15393060           | 64440  | 1673892 | 0.004186302      | 0.00486347 | 0.86076426      | 0.108743291     | 0.12768719 | 0.85163821      |
|                  | 8675    | 18148428           | 99234  | 2638242 | 0.005467912      |            | 1.1242817       | 0.145370277     |            | 1.13848755      |
|                  | 8681    | 16967304           | 83754  | 2187900 | 0.0049362        |            | 1.01495404      | 0.128948005     |            | 1.00987424      |
| TG2576 18 months | 8674    | 18114156           | 87282  | 2829168 | 0.004818441      |            | 0.99074125      | 0.156185472     |            | 1.22318825      |
|                  | 8676    | 18674388           | 70308  | 2310930 | 0.003764943      |            | 0.77412666      | 0.123748634     |            | 0.96915464      |
|                  | 8677    | 19698408           | 114246 | 3577860 | 0.005799758      |            | 1.19251413      | 0.181631937     |            | 1.42247578      |
